# Supplementary material for: Medicaid Patients Have Greater Difficulty Scheduling Health Care Appointments Compared With Private Insurance Patients: A Meta-Analysis
Source: PubMed Central journal article supplement — Inquiry. 2019 Apr 5;56:0046958019838118. doi: 10.1177/0046958019838118 (PMC6452575; doi:10.1177/0046958019838118), 2019-04-05
Supplement: Supplementary_materials.pdf [file Supplementary_materials.pdf]

1 **SUPPLEMENTARY APPENDIX**

2 **Table of contents**

|                                           |       |
|-------------------------------------------|-------|
| <b>Methods:</b> Quality assessment        | Pg 2  |
| <b>Figure S1:</b> Ovid MEDLINE Search     | Pg 3  |
| <b>Table S1:</b> Study population details | Pg 4  |
| <b>Table S2:</b> Risk of bias             | Pg 9  |
| <b>Table S3:</b> Studies with call data   | Pg 11 |
| <b>References</b>                         | Pg 13 |

3 **Methods:** Quality assessment

4 To ascertain the validity of the eligible audit studies, we used  
5 the Cochrane Collaboration's tool for assessing risk of bias  
6 which consists of seven domains: random sequence generation,  
7 allocation concealment, blinding of participants and personnel,  
8 blinding of outcome assessment, incomplete outcome data,  
9 selective reporting, and other bias.<sup>1</sup> One additional domain,  
10 allocation of calls, was used to understand whether studies  
11 called the same office multiple times for each insurance  
12 scenario (low risk of bias) or whether studies called different  
13 offices once with each scenario (high risk of bias), which would  
14 defeat the purpose of each office serving as its own control.  
15 Each domain and overall risk of bias was assessed and

16 categorized as high, low, or unclear for every study. See Table  
17 S2.

18

19 **Figure S1:** Ovid MEDLINE Search (1946 to December Week 1 2016),  
20 Performed January 20, 2017

|    |                                                      |         |
|----|------------------------------------------------------|---------|
| 1  | exp "Appointments and Schedules"/                    | 18561   |
| 2  | cherry pick*.mp.                                     | 99      |
| 3  | appointment\$.mp.                                    | 22353   |
| 4  | secret shopper\$.mp.                                 | 22      |
| 5  | hypothetical patient\$.mp.                           | 613     |
| 6  | simulated patient\$.mp.                              | 1495    |
| 7  | patient simulation/                                  | 4148    |
| 8  | wait* list*.mp.                                      | 17330   |
| 9  | exp medical assistance/                              | 60224   |
| 10 | exp insurance, health/                               | 145283  |
| 11 | exp insurance coverage/ or insurance*.mp.            | 133108  |
| 12 | exp "Patient Protection and Affordable Care Act"/    | 5958    |
| 13 | (affordable care act* or health care reform act).mp. | 6705    |
| 14 | (medicare or medicaid or aca or obamacare).mp.       | 86182   |
| 15 | 1 or 2 or 3 or 4 or 5 or 6 or 7 or 8                 | 44473   |
| 16 | 9 or 10 or 11 or 12 or 13 or 14                      | 233360  |
| 17 | 15 and 16                                            | 1984    |
| 18 | exp United States/                                   | 1386810 |
| 19 | united states.mp.                                    | 1018831 |
| 20 | 17 and (18 or 19)                                    | 1252    |
| 21 | limit 20 to yr="2001 -Current"                       | 814     |
| 22 | wait* time*.mp.                                      | 8668    |
| 23 | 15 or 22                                             | 49462   |
| 24 | 16 and 22                                            | 450     |
| 25 | 24 and (18 or 19)                                    | 235     |
| 26 | limit 25 to yr="2001 -Current"                       | 172     |
| 27 | 21 or 26                                             | 884     |

21

22

23 **Table S1.** Study population details

24

| Study                            | Year Data Collected | Pre / Post ACA | State vs. Multi-state | State(s)                                       | State Medicaid Expansion Status at Time of Study | Pediatric / Adult Scenario | Specialty                                                                  |
|----------------------------------|---------------------|----------------|-----------------------|------------------------------------------------|--------------------------------------------------|----------------------------|----------------------------------------------------------------------------|
| Algothani<br>2012 <sup>2</sup>   | 2011                | Pre            | State                 | OH                                             | N/A                                              | N/A                        | Dermatology                                                                |
| Anandasivam<br>2016 <sup>3</sup> | 2016                | Post           | Multi-state           | CA, MA,<br>OH, NY,<br>FL, GA,<br>TX, NC        | Expanded;<br>Not<br>Expanded                     | Adult                      | Orthopedics                                                                |
| Asplin 2005 <sup>4</sup>         | 2002                | Pre            | Multi-state           | AZ, CA,<br>CO, FL,<br>GA, IL,<br>MN, NY,<br>TX | N/A                                              | Adult                      | Family<br>Medicine,<br>Internal<br>Medicine,<br>Obstetrics /<br>Gynecology |
| Bisgaier<br>2011 <sup>5</sup>    | 2010                | Pre            | State                 | IL                                             | N/A                                              | Pediatric                  | Pediatrics                                                                 |
| Bisgaier<br>2011 <sup>6</sup>    | 2010                | Pre            | State                 | IL                                             | N/A                                              | Pediatric                  | Pediatrics                                                                 |

|                                 |      |      |                 |                                                                                                 |                              |           |                                                            |
|---------------------------------|------|------|-----------------|-------------------------------------------------------------------------------------------------|------------------------------|-----------|------------------------------------------------------------|
| Bisgaier<br>2012 <sup>7</sup>   | 2010 | Pre  | State           | IL                                                                                              | N/A                          | N/A       | Pediatrics                                                 |
| Blanchard<br>2008 <sup>8</sup>  | 2005 | Pre  | State           | DC                                                                                              | N/A                          | Adult     | Internal<br>Medicine                                       |
| Cossman<br>2014 <sup>9</sup>    | 2012 | Pre  | State           | MS                                                                                              | N/A                          | Adult     | Primary Care,<br>Pediatrics,<br>Obstetrics /<br>Gynecology |
| Draeger<br>2014 <sup>10</sup>   | 2013 | Pre  | State           | NC                                                                                              | N/A                          | Adult     | Orthopedics                                                |
| Galbraith<br>2005 <sup>11</sup> | 2003 | Pre  | Multi-<br>state | GA, MD,<br>IL, TX,<br>MN, PA,<br>CA, WA                                                         | N/A                          | Pediatric | Pediatrics                                                 |
| Hamlyn<br>2016 <sup>12</sup>    | 2015 | Post | Multi-<br>state | AL, AZ,<br>CA, CO,<br>CT, DC,<br>FL, IL,<br>IA, MD,<br>MA, MI,<br>MN, MO,<br>NH, NJ,<br>NY, NC, | Expanded;<br>Not<br>Expanded | Adult     | Oncology                                                   |

|                                |      |      |                 |                                         |                              |           |             |
|--------------------------------|------|------|-----------------|-----------------------------------------|------------------------------|-----------|-------------|
|                                |      |      |                 | OH, PA,<br>TN, TX,<br>WA, WI            |                              |           |             |
| Hwang<br>2005 <sup>13</sup>    | 2004 | Pre  | State           | CA                                      | N/A                          | Pediatric | Urology     |
| Iobst 2010 <sup>14</sup>       | 2009 | Pre  | State           | FL                                      | N/A                          | Pediatric | Orthopedics |
| Iobst 2013 <sup>15</sup>       | 2012 | Pre  | Multi-<br>state | All states,<br>excluding<br>DC          | N/A                          | Pediatric | Orthopedics |
| Kim 2015 <sup>16</sup>         | 2014 | Post | Multi-<br>state | CA, MA,<br>OH, NY,<br>FL, PA,<br>TX, NC | Expanded;<br>Not<br>Expanded | Adult     | Orthopedics |
| Kim 2016 <sup>17</sup>         | 2015 | Post | Multi-<br>state | CA, MA,<br>NY, OH,<br>FL, NC,<br>GA, TX | Expanded;<br>Not<br>Expanded | Adult     | Orthopedics |
| Kim 2016 <sup>18</sup>         | 2015 | Post | Multi-<br>state | CA, MA,<br>NY, OH,<br>FL, NC,<br>GA, TX | Expanded;<br>Not<br>Expanded | Adult     | Orthopedics |
| Lavernia<br>2012 <sup>19</sup> | 2011 | Pre  | State           | FL                                      | N/A                          | Adult     | Orthopedics |

|                                      |      |      |                 |                                                |                 |           |                                   |
|--------------------------------------|------|------|-----------------|------------------------------------------------|-----------------|-----------|-----------------------------------|
| Mathieu<br>2012 <sup>20</sup>        | 2011 | Pre  | State           | DC                                             | N/A             | Pediatric | Pediatrics                        |
| Medford-<br>Davis 2017 <sup>21</sup> | 2016 | Post | State           | TX                                             | Not<br>Expanded | Adult     | Orthopedics                       |
| Olsson<br>2013 <sup>22</sup>         | 2012 | Pre  | State           | NC                                             | N/A             | Adult     | Orthopedics                       |
| Patterson<br>2013 <sup>23</sup>      | 2012 | Pre  | State           | NC                                             | N/A             | Adult     | Orthopedics                       |
| Patterson<br>2014 <sup>24</sup>      | 2013 | Pre  | State           | NC                                             | N/A             | Adult     | Orthopedics                       |
| Pierce 2012 <sup>25</sup>            | 2011 | Pre  | Multi-<br>state | OH, IN,<br>KY                                  | N/A             | Pediatric | Orthopedics                       |
| Pollack<br>2016 <sup>26</sup>        | 2015 | Post | State           | PA                                             | Expanded        | Adult     | Urology,<br>Radiation<br>Oncology |
| Potak 2017 <sup>27</sup>             | 2016 | Post | State           | FL                                             | Not<br>Expanded | Pediatric | Pediatrics                        |
| Rhodes<br>2009 <sup>28</sup>         | 2002 | Pre  | Multi-<br>state | AZ, CA,<br>CO, FL,<br>GA, IL,<br>MN, NY,<br>TX | N/A             | N/A       | Psychiatry                        |

|                                |      |      |                 |                                                    |                              |           |               |
|--------------------------------|------|------|-----------------|----------------------------------------------------|------------------------------|-----------|---------------|
| Rhodes<br>2014 <sup>29</sup>   | 2012 | Pre  | State           | AR, GA,<br>IL, IA,<br>MA, MT,<br>NJ, OR,<br>PA, TX | N/A                          | Adult     | Primary Care  |
| Sabatini<br>2012 <sup>30</sup> | 2011 | Pre  | State           | CA                                                 | N/A                          | Pediatric | Orthopedics   |
| Skaggs<br>2001 <sup>31</sup>   | 1999 | Pre  | State           | CA                                                 | N/A                          | Pediatric | Orthopedics   |
| Steinman<br>2015 <sup>32</sup> | 2012 | Pre  | State           | OH                                                 | N/A                          | Pediatric | Psychiatry    |
| Wiznia<br>2017 <sup>33</sup>   | 2015 | Post | Multi-<br>state | CA, MA,<br>OH, NY,<br>FL, GA,<br>TX, NC            | Expanded;<br>Not<br>Expanded | Adult     | Endocrinology |
| Wiznia<br>2017 <sup>34</sup>   | 2015 | Post | Multi-<br>state | CA, MA,<br>OH, NY,<br>FL, GA,<br>TX, NC            | Expanded;<br>Not<br>Expanded | Adult     | Pain Medicine |
| Wiznia<br>2017 <sup>35</sup>   | 2016 | Post | Multi-<br>state | CA, MA,<br>OH, NY,<br>FL, GA,<br>TX, NC            | Expanded;<br>Not<br>Expanded | Adult     | Psychiatry    |



25 **Table S2:** Risk of bias

| Study                         | Random sequence generation | Allocation concealment | Blinding of participants and personnel | Blinding of outcomes data | Incomplete outcome data | Selective reporting | Other bias | Allocation of calls |
|-------------------------------|----------------------------|------------------------|----------------------------------------|---------------------------|-------------------------|---------------------|------------|---------------------|
| Algothani 2012 <sup>2</sup>   | +                          | -                      | -                                      | +                         | +                       | +                   | +          | -                   |
| Anandasivam 2016 <sup>3</sup> | +                          | -                      | -                                      | +                         | +                       | +                   | +          | +                   |
| Asplin 2005 <sup>4</sup>      | +                          | -                      | -                                      | +                         | +                       | +                   | -          | +                   |
| Bisgaier 2011 <sup>5</sup>    | +                          | -                      | -                                      | -                         | +                       | +                   | +          | -                   |
| Bisgaier 2011 <sup>6</sup>    | +                          | -                      | -                                      | +                         | +                       | +                   | +          | +                   |
| Bisgaier 2012 <sup>7</sup>    | +                          | -                      | -                                      | +                         | +                       | +                   | -          | +                   |
| Blanchard 2008 <sup>8</sup>   | +                          | -                      | -                                      | +                         | -                       | +                   | +          | +                   |
| Cossmann 2014 <sup>9</sup>    | +                          | -                      | -                                      | +                         | +                       | +                   | +          | +                   |
| Draeger 2014 <sup>10</sup>    | +                          | -                      | -                                      | +                         | +                       | +                   | +          | +                   |
| Galbraith 2005 <sup>11</sup>  | +                          | -                      | -                                      | +                         | +                       | +                   | +          | +                   |
| Hamlyn 2016 <sup>12</sup>     | ?                          | -                      | -                                      | +                         | +                       | +                   | +          | +                   |
| Hwang 2005 <sup>13</sup>      | +                          | -                      | -                                      | -                         | +                       | +                   | -          | +                   |
| Iobst 2010 <sup>14</sup>      | +                          | -                      | -                                      | +                         | +                       | +                   | +          | +                   |
| Iobst 2013 <sup>15</sup>      | +                          | -                      | -                                      | +                         | +                       | +                   | +          | +                   |
| Kim 2015 <sup>16</sup>        | +                          | -                      | -                                      | +                         | +                       | +                   | +          | +                   |
| Kim 2016 <sup>17</sup>        | +                          | -                      | -                                      | +                         | +                       | +                   | +          | +                   |

|                                                                 |   |   |   |   |   |   |   |   |
|-----------------------------------------------------------------|---|---|---|---|---|---|---|---|
| Kim 2016 <sup>18</sup>                                          | + | - | - | + | + | + | + | + |
| Lavernia 2012 <sup>19</sup>                                     | + | - | - | + | + | + | - | + |
| Mathieu 2012 <sup>20</sup>                                      | + | - | - | + | + | - | + | + |
| Medford-Davis<br>2017 <sup>21</sup>                             | + | - | - | + | + | + | + | + |
| Olsson 2013 <sup>22</sup>                                       | + | - | - | + | + | + | + | + |
| Patterson 2013 <sup>23</sup>                                    | + | - | - | + | + | + | + | + |
| Patterson 2014 <sup>24</sup>                                    | + | - | - | + | + | + | + | + |
| Pierce 2012 <sup>25</sup>                                       | + | - | - | + | + | + | - | + |
| Pollack 2016 <sup>26</sup>                                      | - | - | - | + | + | + | + | - |
| Potak 2017 <sup>27</sup>                                        | + | - | - | + | + | + | + | + |
| Rhodes 2009 <sup>28</sup>                                       | + | - | - | + | + | + | + | + |
| Rhodes 2014 <sup>29</sup>                                       | + | - | - | + | + | + | + | - |
| Sabatini 2012 <sup>30</sup>                                     | + | - | - | + | + | + | + | + |
| Skaggs 2001 <sup>31</sup>                                       | + | - | - | + | + | + | + | + |
| Steinman 2015 <sup>32</sup>                                     | + | - | - | + | + | + | + | + |
| Wiznia 2017 <sup>33</sup>                                       | + | - | - | + | + | + | + | + |
| Wiznia 2017 <sup>34</sup>                                       | + | - | - | + | + | + | + | + |
| Wiznia 2017 <sup>35</sup>                                       | + | - | - | + | + | + | + | + |
| + Low risk of bias; – High risk of bias; ? Unclear risk of bias |   |   |   |   |   |   |   |   |

27 **Table S3:** Studies with call data

| Study                        | Year*     | Region         | Specialty    | Private Insurance |           |        | Medicaid |           |       | Medicare |           |       | Cash Pay |           |       |
|------------------------------|-----------|----------------|--------------|-------------------|-----------|--------|----------|-----------|-------|----------|-----------|-------|----------|-----------|-------|
|                              |           |                |              | Total             | Successes | (%)    | Total    | Successes | (%)   | Total    | Successes | (%)   | Total    | Successes | (%)   |
| Skaggs 2001 <sup>31</sup>    | 1999      | California     | Orthopedics  | 50                | 50        | (100%) | 50       | 1         | (2%)  |          |           |       |          |           |       |
| Asplin 2005 <sup>4</sup>     | 2002      | Multi-state    | Primary Care | 430               | 277       | (64%)  | 231      | 79        | (34%) |          |           |       | 199      | 125       | (63%) |
| Rhodes 2009 <sup>28</sup>    | 2002      | Multi-state    | Psychiatry   | 78                | 34        | (44%)  | 55       | 16        | (29%) |          |           |       | 23       | 13        | (57%) |
| Galbraith 2005 <sup>11</sup> | 2003-2004 | Multi-state    | Pediatrics   | 401               | 390       | (97%)  | 401      | 313       | (78%) |          |           |       |          |           |       |
| Hwang 2005 <sup>13</sup>     | 2004      | California     | Urology      | 46                | 44        | (96%)  | 46       | 19        | (41%) |          |           |       |          |           |       |
| Blanchard 2008 <sup>8</sup>  | 2005      | Washington DC  | Primary Care | 38                | 20        | (53%)  | 41       | 11        | (27%) | 39       | 19        | (49%) | 37       | 4         | (11%) |
| Iobst 2010 <sup>14</sup>     | 2009      | Florida        | Orthopedics  | 100               | 36        | (36%)  | 100      | 8         | (8%)  |          |           |       |          |           |       |
| Bisgaier 2011 <sup>5</sup>   | 2010      | Illinois       | Multiple     | 14                | 13        | (93%)  | 14       | 13        | (93%) |          |           |       |          |           |       |
| Bisgaier 2012 <sup>7</sup>   | 2010      | Illinois       | Multiple     | 273               | 273       | (100%) | 273      | 118       | (43%) |          |           |       |          |           |       |
| Bisgaier 2011 <sup>6</sup>   | 2010      | Illinois       | Multiple     | 273               | 244       | (89%)  | 273      | 94        | (34%) |          |           |       |          |           |       |
| Alghothani 2012 <sup>2</sup> | 2011      | Ohio           | Dermatology  | 100               | 91        | (91%)  | 104      | 31        | (30%) |          |           |       |          |           |       |
| Lavernia 2012 <sup>19</sup>  | 2011      | Florida        | Orthopedics  | 77                | 77        | (100%) | 77       | 11        | (14%) |          |           |       |          |           |       |
| Pierce 2012 <sup>25</sup>    | 2011      | Multi-state    | Orthopedics  | 42                | 42        | (100%) | 42       | 6         | (14%) |          |           |       |          |           |       |
| Mathieu 2012 <sup>20</sup>   | 2011      | Washington DC  | Pediatrics   | 29                | 11        | (38%)  | 86       | 36        | (42%) |          |           |       | 57       | 27        | (47%) |
| Sabatini 2012 <sup>30</sup>  | 2011      | California     | Orthopedics  | 45                | 19        | (42%)  | 45       | 1         | (2%)  |          |           |       |          |           |       |
| Patterson 2013 <sup>23</sup> | 2012      | North Carolina | Orthopedics  | 71                | 68        | (96%)  | 71       | 51        | (72%) |          |           |       |          |           |       |
| Steinman 2015 <sup>32</sup>  | 2012      | Ohio           | Psychiatry   | 406               | 103       | (25%)  | 431      | 79        | (18%) |          |           |       |          |           |       |
| Cossman 2014 <sup>9</sup>    | 2012      | Mississippi    | Primary Care | 678               | 532       | (78%)  | 678      | 343       | (51%) | 588      | 383       | (65%) |          |           |       |
| Iobst 2013 <sup>15</sup>     | 2012      | Multi-state    | Orthopedics  | 250               | 205       | (82%)  | 250      | 59        | (24%) |          |           |       |          |           |       |
| Olsson 2013 <sup>22</sup>    | 2012      | North Carolina | Orthopedics  | 45                | 33        | (73%)  | 45       | 18        | (40%) |          |           |       |          |           |       |
| Rhodes 2014 <sup>29</sup>    | 2012-2013 | Multi-state    | Primary Care | 5385              | 4480      | (83%)  | 4352     | 2473      | (57%) |          |           |       |          |           |       |
| Draeger 2014 <sup>10</sup>   | 2013      | North Carolina | Orthopedics  | 87                | 71        | (82%)  | 87       | 58        | (67%) |          |           |       |          |           |       |
| Patterson 2014 <sup>24</sup> | 2013      | North Carolina | Orthopedics  | 132               | 95        | (72%)  | 132      | 70        | (53%) |          |           |       |          |           |       |
| Kim 2015 <sup>16</sup>       | 2014      | Multi-state    | Orthopedics  | 488               | 472       | (97%)  | 492      | 171       | (35%) | 356      | 339       | (95%) |          |           |       |
| Hamlyn 2016 <sup>12</sup>    | 2015      | Multi-state    | Oncology     | 78                | 47        | (60%)  | 79       | 47        | (59%) |          |           |       |          |           |       |
| Kim 2016 <sup>17</sup>       | 2015      | Multi-state    | Orthopedics  | 188               | 170       | (90%)  | 192      | 38        | (20%) | 188      | 173       | (92%) |          |           |       |

|                                  |      |              |                 |     |     |        |     |     |       |     |     |        |     |     |       |
|----------------------------------|------|--------------|-----------------|-----|-----|--------|-----|-----|-------|-----|-----|--------|-----|-----|-------|
| Kim 2016 <sup>18</sup>           | 2015 | Multi-state  | Orthopedics     | 240 | 232 | (97%)  | 240 | 48  | (20%) | 240 | 214 | (89%)  |     |     |       |
| Pollack 2016 <sup>26</sup>       | 2015 | Pennsylvania | Multiple        | 223 | 198 | (89%)  | 223 | 115 | (52%) | 223 | 222 | (100%) | 223 | 199 | (89%) |
| Wiznia 2017 <sup>34</sup>        | 2015 | Multi state  | Pain Management | 235 | 97  | (41%)  | 235 | 17  | (7%)  | 235 | 93  | (40%)  | 235 | 63  | (27%) |
| Wiznia 2017 <sup>33</sup>        | 2015 | Multi state  | Endocrinology   | 247 | 134 | (54%)  | 247 | 83  | (34%) | 247 | 76  | (31%)  | 0   | 0   |       |
| Medford-Davis 2017 <sup>21</sup> | 2016 | Texas        | Orthopedics     | 59  | 49  | (83%)  | 43  | 6   | (14%) |     |     |        | 102 | 83  | (81%) |
| Potak 2017 <sup>27</sup>         | 2016 | Florida      | Orthopedics     | 99  | 99  | (100%) | 99  | 75  | (76%) |     |     |        |     |     |       |
| Wiznia 2017 <sup>35</sup>        | 2016 | Multi state  | Psychiatry      | 240 | 129 | (54%)  | 240 | 37  | (15%) | 240 | 81  | (34%)  | 240 | 123 | (51%) |
| Anandasivam 2016 <sup>3</sup>    | 2016 | Multi state  | Orthopedics     | 240 | 228 | (95%)  | 240 | 2   | (1%)  | 0   | 0   |        | 0   | 0   |       |

\* Three studies published prior to 2010 did not explicitly state the timeframe of data collection. The data were assumed to be collected in year prior to publication, and these studies were included in the Pre-ACA group.

28

29

30

31

## 32 **References**

- 33 1. Higgins J, Green S. Cochrane Handbook for Systematic Reviews of Interventions: John  
34 Wiley & Sons; The Cochrane Collaboration; 2011.
- 35 2. Alghothani L, Jacks SK, Vander Horst A, Zirwas MJ. Disparities in access to  
36 dermatologic care according to insurance type. Archives of Dermatology 2012;148:956-7.
- 37 3. Anandasivam NS, Wiznia DH, Kim CY, Save AV, Grauer JN, Pelker RR. Access of Patients  
38 with Lumbar Disc Herniations to Spine Surgeons: The Effect of Insurance Type Under the  
39 Affordable Care Act. Spine 2016.
- 40 4. Asplin BR, Rhodes KV, Levy H, et al. Insurance status and access to urgent  
41 ambulatory care follow-up appointments. JAMA 2005;294:1248-54.
- 42 5. Bisgaier J, Levinson D, Cutts DB, Rhodes KV. Access to autism evaluation  
43 appointments with developmental-behavioral and neurodevelopmental subspecialists.  
44 Archives of Pediatrics & Adolescent Medicine 2011;165:673-4.
- 45 6. Bisgaier J, Rhodes KV. Auditing access to specialty care for children with public  
46 insurance. New England Journal of Medicine 2011;364:2324-33.
- 47 7. Bisgaier J, Polsky D, Rhodes KV. Academic medical centers and equity in specialty  
48 care access for children. Archives of Pediatrics & Adolescent Medicine 2012;166:304-10.

- 49 8. Blanchard J, Ogle K, Thomas O, Lung D, Asplin B, Lurie N. Access to appointments  
50 based on insurance status in Washington, D.C. Journal of Health Care for the Poor &  
51 Underserved 2008;19:687-96.
- 52 9. Cossman RE, Cossman JS, Rogers S, et al. Access to primary care physicians differs  
53 by health insurance coverage in Mississippi. Southern medical journal 2014;107:87-90.
- 54 10. Draeger RW, Patterson BM, Olsson EC, Schaffer A, Patterson JM. The influence of  
55 patient insurance status on access to outpatient orthopedic care for flexor tendon  
56 lacerations. The Journal of hand surgery 2014;39:527-33.
- 57 11. Galbraith AA, Grossman DC, Koepsell TD, Heagerty PJ, Christakis DA. Medicaid  
58 acceptance and availability of timely follow-up for newborns with Medicaid. Pediatrics  
59 2005;116:1148-54.
- 60 12. Hamlyn GS, Hutchins KE, Johnston AL, Thomas RT, Tian J, Kamal AH. Accessibility and  
61 Barriers to Oncology Appointments at 40 National Cancer Institute-Designated  
62 Comprehensive Cancer Centers: Results of a Mystery Shopper Project. Journal of oncology  
63 practice/American Society of Clinical Oncology 2016;12:e884-e900.
- 64 13. Hwang AH, Hwang MM, Xie HW, Hardy BE, Skaggs DL. Access to urologic care for  
65 children in California: Medicaid versus private insurance. Urology 2005;66:170-3.

- 66 14. Iobst C. Access to Care for Children With Fractures. Journal of pediatric  
67 orthopaedics 2010;30:244-7.
- 68 15. Iobst C, Arango D, Segal D, Skaggs DL. National access to care for children with  
69 fractures. Journal of pediatric orthopedics 2013;33:587-91.
- 70 16. Kim CY, Wiznia DH, Hsiang WR, Pelker RR. The Effect of Insurance Type on Patient  
71 Access to Knee Arthroplasty and Revision under the Affordable Care Act. Journal of  
72 Arthroplasty 2015;30:1498-501.
- 73 17. Kim CY, Wiznia DH, Roth AS, Walls RJ, Pelker RR. Survey of Patient Insurance Status  
74 on Access to Specialty Foot and Ankle Care Under the Affordable Care Act. Foot & Ankle  
75 International 2016;37:776-81.
- 76 18. Kim CY, Wiznia DH, Wang Y, et al. The Effect of Insurance Type on Patient Access to  
77 Carpal Tunnel Release Under the Affordable Care Act. Journal of Hand Surgery - American  
78 Volume 2016;41:503-9.e1.
- 79 19. Lavernia CJ. Access to Arthroplasty in South Florida. The Journal of arthroplasty  
80 2012;27:1585-8.

81 20. Mathieu RP, Blanchard J, Sekaran A, Nash R, Winter L, Prideaux C. Access to urgent  
82 pediatric primary care appointments in the District of Columbia. Academic Emergency  
83 Medicine 2012;19:S137.

84 21. Medford-Davis L, Lin F, Greenstein A, Rhodes KV. "I Broke My Ankle": Access to  
85 Orthopedic Follow-up Care by Insurance Status. Academic Emergency Medicine 2017;24:98-  
86 105.

87 22. Olsson E, Lim MR, Mackinnon-Patterson B, Draeger RW. Access to outpatient care for  
88 adult lumbar disc herniation patients with private insurance versus medicaid. Spine  
89 Journal 2013;1):14S.

90 23. Patterson BM, Spang JT, Draeger RW, Olsson EC, Creighton RA, Kamath GV. Access to  
91 outpatient care for adult rotator cuff patients with private insurance versus Medicaid in  
92 North Carolina. Journal of shoulder and elbow surgery / American Shoulder and Elbow  
93 Surgeons [et al] 2013;22:1623-7.

94 24. Patterson BM, Draeger RW, Olsson EC, Spang JT, Lin FC, Kamath GV. A regional  
95 assessment of medicaid access to outpatient orthopaedic care: the influence of population  
96 density and proximity to academic medical centers on patient access. The Journal of bone  
97 and joint surgery American volume 2014;96:e156.



98 25. Pierce TR, Mehlman CT, Tamai J, Skaggs DL. Access to care for the adolescent  
99 anterior cruciate ligament patient with Medicaid versus private insurance. Journal of  
100 pediatric orthopedics 2012;32:245-8.

101 26. Pollack CE, Ross ME, Armstrong K, et al. Using a Mystery-Caller Approach to Examine  
102 Access to Prostate Cancer Care in Philadelphia. PLoS ONE Electronic Resource]  
103 2016;11:e0164411.

104 27. Potak H, C AI. Influence of Insurance Type on the Access to Pediatric Care for  
105 Children With Distal Radius Torus Fractures. Journal of Pediatric Orthopaedics 2017;05.

106 28. Rhodes KV, Vieth TL, Kushner H, Levy H, Asplin BR. Referral without access: for  
107 psychiatric services, wait for the beep. Annals of Emergency Medicine 2009;54:272-8.

108 29. Rhodes KV, Kenney GM, Friedman AB, et al. Primary care access for new patients on  
109 the eve of health care reform. JAMA Internal Medicine 2014;174:861-9.

110 30. Sabatini CS, Skaggs KF, Kay RM, Skaggs DL. Orthopedic surgeons are less likely to  
111 see children now for fracture care compared with 10 years ago. Journal of Pediatrics  
112 2012;160:505-7.

- 113 31. Skaggs DL, Clemens SM, Vitale MG, Femino JD, Kay RM. Access to orthopedic care for  
114 children with Medicaid versus private insurance in California. Pediatrics 2001;107:1405-  
115 8.
- 116 32. Steinman KJ, Shoben AB, Dembe AE, Kelleher KJ. How Long Do Adolescents Wait for  
117 Psychiatry Appointments? Community mental health journal 2015.
- 118 33. Wiznia DH, Ndon S, Kim CY, Zaki T, Leslie MP. The Effect of Insurance Type on  
119 Fragility Fracture Patient Access to Endocrinology Under the Affordable Care Act. Geriatr  
120 Orthop Surg Rehabil 2017;8:23-9.
- 121 34. Wiznia DH, Zaki T, Maisano J, Kim CY, Halaszynski TM, Leslie MP. Influence of  
122 Medical Insurance Under the Affordable Care Act on Access to Pain Management of the  
123 Trauma Patient. Regional Anesthesia & Pain Medicine 2017;42:39-44.
- 124 35. Wiznia DH, Maisano J, Kim CY, Zaki T, Lee HB, Leslie MP. The effect of insurance  
125 type on trauma patient access to psychiatric care under the Affordable Care Act. Gen Hosp  
126 Psychiatry 2017;45:19-24.

127
